# Supplementary material for: Analysis of Memory B Cell Responses and Isolation of Novel Monoclonal Antibodies with Neutralizing Breadth from HIV-1-Infected Individuals
Source: PubMed Central journal article supplement (PMC2808385; doi:10.1371/journal.pone.0008805), 2010-01-20
Supplement: pone.0008805.s001.pdf [file pone.0008805.s001.pdf]

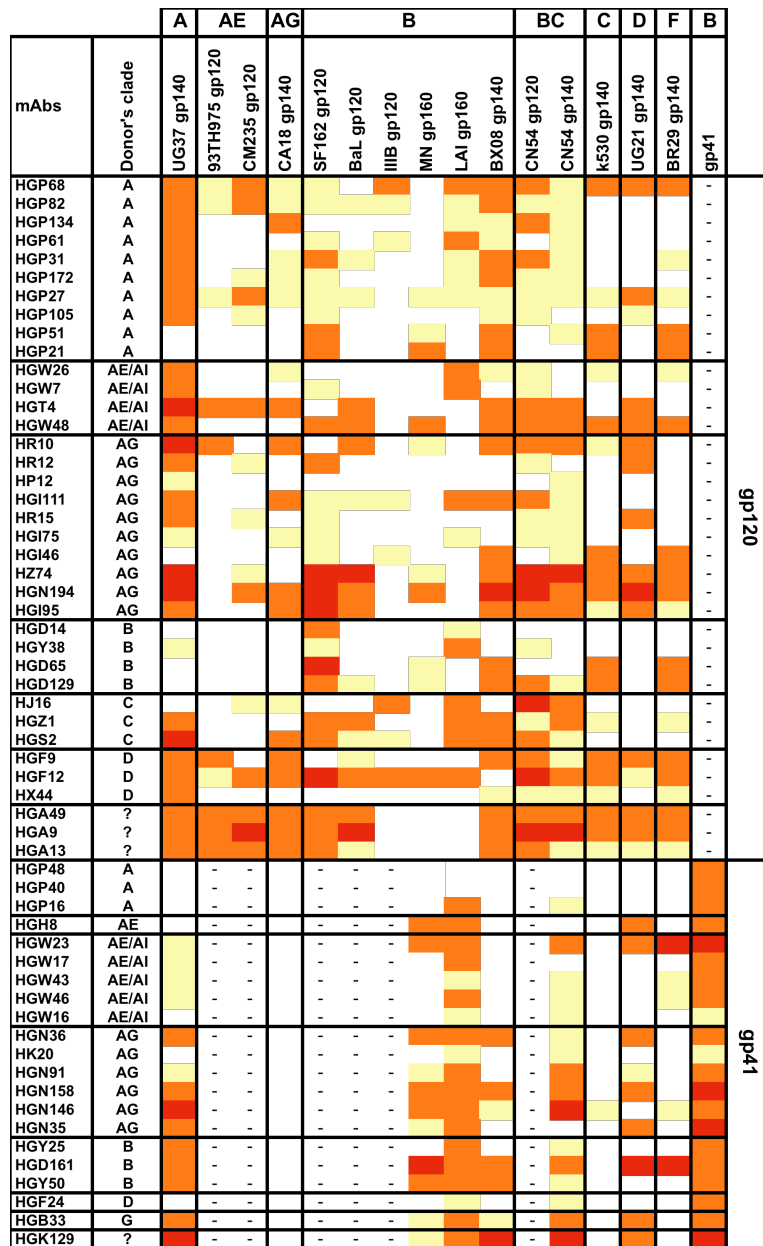

**Figure S1. Binding of gp120 and gp41-specific mAbs to a panel of 15 recombinant Env proteins from different clades.** Different dilutions of mAbs were tested in ELISA against a panel of recombinant Env proteins representing 8 different clades. The mAbs are grouped according to the donor's virus clade. Shown is the the half maximal binding concentration ( $K_{50}$ ): red, 0.001-0.1  $\mu\text{g/ml}$ , orange 0.1-5  $\mu\text{g/ml}$ , yellow 5-500  $\mu\text{g/ml}$ , white, no measurable binding.
