# Supplementary material for: Analysis of Memory B Cell Responses and Isolation of Novel Monoclonal Antibodies with Neutralizing Breadth from HIV-1-Infected Individuals
Source: PubMed Central journal article supplement (PMC2808385; doi:10.1371/journal.pone.0008805), 2010-01-20
Supplement: pone.0008805.s002.pdf [file pone.0008805.s002.pdf]

**Table S1. Clinical status of HIV-1 donors and HIV-1 neutralization breadth of plasma samples**

| Donor code | Cohort  | Donor's clade | mAb code | Age | Years after infection / diagnosis | Viremia copies/ml | CD4 count | HAART         | Serum reacts to |         |         |      |         |         |
|------------|---------|---------------|----------|-----|-----------------------------------|-------------------|-----------|---------------|-----------------|---------|---------|------|---------|---------|
|            |         |               |          |     |                                   |                   |           |               | Clade A         | Clade B | Clade C | CRFs | Clade D | Clade F |
| T650       | London  | D             | HX       | 44  | 14.5                              | <40               | 518       | 2006- to date | na              | na      | 0/2     | 2/3  | na      | 1/1     |
| VI 3208    | Antwerp | C             | HJ       | 45  | 12                                | <50               | 274       | 1997- to date | na              | na      | 2/4     | 4/6  | na      | na      |
| VI3265     | Antwerp | CRF02_AG      | HGN      | 41  | 10                                | 125               | 765       | Naïve         | 3/4             | 3/4     | 2/4     | 4/6  | na      | na      |
| VI 3081    | Antwerp | CRF02_AG      | HK       | 31  | 1                                 | 150               | 623       | Naïve         | 2/4             | na      | 3/4     | 2/6  | na      | na      |
| K500b      | London  | C             | HGZ      | 40  | 4.5                               | 1773              | 525       | 2005          | na              | 0/2     | 2/3     | 0/4  | 0/1     | 0/1     |
| D600       | London  | CRF01_AE      | HGT      | 33  | 5.5                               | 1821              | 707       | 2002          | na              | 1/2     | 1/3     | 0/4  | 0/1     | 0/1     |
| VI3229     | Antwerp | CRF02/A1      | HZ       | 43  | 20                                | 6260              | 384       | 1997-2003     | 2/4             | na      | 1/4     | 2/6  | na      | na      |
| VI3207     | Antwerp | A             | HGP      | 40  | 11                                | 26700             | 410       | 2006- to date | 2/4             | na      | 1/4     | 4/6  | na      | na      |
| G400       | London  | B             | HGY      | 40  | 13                                | 27477             | 394       | Naïve         | na              | 0/2     | 2/3     | 1/4  | 0/1     | 0/1     |
| VI3248     | Antwerp | B             | HGD      | 45  | 16                                | 71000             | 373       | Naïve         | 2/4             | 4/4     | 2/4     | 4/6  | na      | na      |
| K300c      | London  | C             | HGH      | 36  | 7                                 | 72901             | 362       | Naïve         | na              | 0/2     | 3/3     | 1/4  | 0/1     | 0/1     |
| B420       | London  | CRF02_AG      | HGI      | 37  | 4                                 | 86655             | 340       | Naïve         | na              | 1/2     | 2/3     | 0/4  | 0/1     | 0/1     |
| A260       | London  | AE/AI         | HGW      | 30  | 2.5                               | 140434            | 362       | Naïve         | na              | 1/2     | 1/3     | 1/4  | 1/1     | 0/1     |
| VI 3176    | Antwerp | CRF02_AG      | HP       | 32  | 7                                 | 300000            | 371       | 2006- to date | 3/4             | 2/4     | 3/4     | 6/6  | na      | na      |
| VI 3221    | Antwerp | CRF02_AG      | HY       | 31  | 6                                 | 330000            | 258       | Naïve         | 3/4             | 2/4     | 4/4     | 6/6  | na      | na      |
| VI 3186    | Antwerp | CRF02_AG      | HR       | 63  | 10                                | 557000            | 259       | 2006- to date | 1/4             | na      | 1/4     | 4/6  | na      | na      |
| m240       | London  | C             | HGS      | na  | na                                | na                | na        | na            | na              | na      | na      | na   | na      | na      |
| M320c      | London  | D             | HGF      | 32  | 5                                 | <50               | 311       | Naïve         | na              | 1/2     | 0/3     | 1/4  | 0/1     | 0/1     |
| U225       | London  | G             | HGB      | na  | na                                | na                | na        | na            | na              | 0/2     | 0/3     | 1/4  | 0/1     | 1/1     |
| R163       | London  | ?             | HGA      | 36  | na                                | <1000             | na        | 2002          | na              | 1/2     | 1/3     | 0/4  | 0/1     | 0/1     |
| S162       | London  | ?             | HGK      | 34  | 13                                | <40               | 416       | Naïve         | na              | 2/2     | 2/3     | 2/4  | 0/1     | 0/1     |

Shown is the donor code and cohort, the clade of infecting virus, the code assigned to the mAbs derived, clinical information and information regarding the state of the infection, therapy and breadth of reactivities of serum. na, not available.
