# Supplementary material for: Analysis of Memory B Cell Responses and Isolation of Novel Monoclonal Antibodies with Neutralizing Breadth from HIV-1-Infected Individuals
Source: PubMed Central journal article supplement (PMC2808385; doi:10.1371/journal.pone.0008805), 2010-01-20
Supplement: pone.0008805.s003.pdf [file pone.0008805.s003.pdf]

**Table S2. Mab IC50 tiers against HIV-1 in TZM-bl cells**

| Env clone      | Tier        | Year     | Weeks after infection | Location         | A         | AE  | CRF02_AG | B    | C    | D    | F   | nd |
|----------------|-------------|----------|-----------------------|------------------|-----------|-----|----------|------|------|------|-----|----|
| A              | MS208A1     | 1992     | chronic               | Montserrat       |           |     |          |      |      |      |     |    |
|                | 92RW020.2   | 1992     | chronic               | Rwanda           |           |     |          |      |      |      |     |    |
|                | Q769.422    | 2002     | Acute                 | Kenya            |           |     |          |      |      |      |     |    |
|                | Q461.e2     | 2002     | Acute                 | Kenya            |           |     |          |      |      |      |     |    |
| B              | Q259.42.17  | 2002     | Acute                 | Kenya            |           |     |          |      |      |      |     |    |
|                | ESL26       | 1985     | chronic               | USA              | 0.4       | 3.5 | 48.5     | 36.7 |      |      |     |    |
|                | TKO.11      | 1985     | 4                     | Italy            |           |     |          |      |      |      |     |    |
|                | SF162       | 1999     | 1                     | San Francisco    |           |     |          |      |      |      |     |    |
|                | MN-3        | 2000     | 1                     | USA              | 16.3      | 4.7 | 18.2     | 46.1 | 14.8 | 12.4 | 2.6 |    |
|                | WIT04160.33 | 2000     | 1                     | Alabama          | 0.1       | 0.2 | 0.9      | 6.4  | 0.5  |      |     |    |
|                | PVO.4       | 1996     | 4                     | Italy            |           |     |          |      |      |      |     |    |
|                | 6535.3      | 1995     | 6                     | Washington D.C.  |           |     |          |      |      |      |     |    |
|                | SC42261.8   | 1995     | 4                     | Trinidad         |           |     |          |      |      |      |     |    |
|                | CH0692.42   | 1994     | 6                     | France           |           |     |          |      |      |      |     |    |
|                | BR08.16     | 1997     | 16                    | USA              |           |     |          |      |      |      |     |    |
|                | C           | SS1196.1 | 1997                  | chronic          | Tennessee | 0.8 | 4.8      | 10.7 |      |      |     |    |
| RHPA4259.7     |             | 2000     | <8                    | Alabama          | 0.4       | 5.7 | 16.0     | 35.7 |      |      |     |    |
| THRO4153.18    |             | 2000     | 1                     | Alabama          |           |     |          |      |      |      |     |    |
| REJO4541.67    |             | 2001     | 2                     | Alabama          | 1.3       |     |          |      |      |      |     |    |
| AC10.0.29      |             | 1998     | 4                     | Massachusetts    |           |     |          |      |      |      |     |    |
| CAAN6342.A2    |             | 2004     | <12                   | Alabama          |           |     |          |      |      |      |     |    |
| TRJ04561.58    |             | 2001     | 1                     | Alabama          |           |     |          |      |      |      |     |    |
| 93MN0652.6     |             | 1989     | 7                     | Malawi           | 4.4       |     |          |      |      |      |     |    |
| DU422.1        |             | 1986     | 8                     | Durban           |           |     |          |      |      |      |     |    |
| CAP452.00.E8   |             | 2005     | 5                     | Durban           | <0.02     |     |          |      |      |      |     |    |
| DU156.12       |             | 1999     | <4                    | Durban           |           |     |          |      |      |      |     |    |
| DU172.17       |             | 1998     | 12                    | Durban           |           |     |          |      |      |      |     |    |
| DU151.2        | 1998        | 6        | Durban                |                  |           |     |          |      |      |      |     |    |
| ZM214M.PL15    | 2003        | <13      | Lusaka                |                  |           |     |          |      |      |      |     |    |
| ZM249M.PL1     | 2003        | <1       | Lusaka                |                  |           |     |          |      |      |      |     |    |
| ZM197MB7       | 2002        | <15      | Lusaka                |                  |           |     |          |      |      |      |     |    |
| CAP210.2.00.E8 | 2005        | 5        | Durban                |                  |           |     |          |      |      |      |     |    |
| ZM83M.PB12     | 2000        | <14      | Lusaka                |                  |           |     |          |      |      |      |     |    |
| ZM233M.PB6     | 2002        | <15      | Lusaka                |                  |           |     |          |      |      |      |     |    |
| ZM109FPB4      | 2000        | <14      | Lusaka                |                  |           |     |          |      |      |      |     |    |
| 96ZM651.2      | 1996        | 7        | Zambia                |                  |           |     |          |      |      |      |     |    |
| ZM135M.PL10a   | 1998        | <15      | Lusaka                |                  |           |     |          |      |      |      |     |    |
| AD             | Q168.82     | 1995     | Acute                 | Kenya            |           |     |          |      |      |      |     |    |
|                | 283-8       | 2002     | Acute                 | Kenya            |           |     |          |      |      |      |     |    |
| AG             | T2E7-31     | 2002     | Acute                 | Cameroon W. Afr. | 46.1      |     |          |      |      |      |     |    |
|                | Z71-11      | 2002     | Acute                 | Cameroon         |           |     |          |      |      |      |     |    |
| BC             | CH10.2      | 2002     | chronic               | Beijing China    | 41.8      |     |          |      |      |      |     |    |
|                | CH064.20    | 2002     | chronic               | Beijing China    |           |     |          |      |      |      |     |    |
| CH             | CH11.18     | 2002     | chronic               | Beijing China    |           |     |          |      |      |      |     |    |
|                | CH11.18     | 2002     | chronic               | Beijing China    |           |     |          |      |      |      |     |    |

MAbs were purified and tested at different concentrations starting from 50 µg/ml for their capacity to neutralize 46 HIV-1 pseudoparticles representing 6 different clades. Shown are IC50 values (µg/ml). Black cases, 0.01-1 µg/ml; dark grey, 1.1-10 µg/ml; light grey, 10.1-50 µg/ml; MAb neutralizing <50% at 50 µg/ml were scored as negative (-).
