# Supplementary material for: Analysis of Memory B Cell Responses and Isolation of Novel Monoclonal Antibodies with Neutralizing Breadth from HIV-1-Infected Individuals
Source: PubMed Central journal article supplement (PMC2808385; doi:10.1371/journal.pone.0008805), 2010-01-20
Supplement: pone.0008805.s004.pdf [file pone.0008805.s004.pdf]

**Table S3. Percentage of HIV-1 isolates neutralized in the TZM-bl based neutralization assay shown in Figure 2**

|               | HK20          | HGN194      | HJ16 | b12  | 2G12 | 2F5 | 4E10 | 447-52D |      |
|---------------|---------------|-------------|------|------|------|-----|------|---------|------|
| All (92)      | 3%            | 21%         | 36%  | 47%  | 28%  | 39% | 98%  | 11%     |      |
| Tier 1 (10)   | 20%           | 100%        | 10%  | 80%  | 67%  | 67% | 100% | 88%     |      |
| Tier 2 (82)   | 1%            | 11%         | 39%  | 43%  | 23%  | 36% | 99%  | 4%      |      |
| Tier-1+Tier-2 | Clade A (8)   | 25%         | 38%  | 25%  | 25%  | 13% | 88%  | 100%    | 0%   |
|               | Clade AD (1)  | 0%          | 0%   | 100% | 0%   | 0%  | 100% | 100%    | 0%   |
|               | Clade AG (16) | 0%          | 0%   | 50%  | 25%  | 38% | 25%  | 100%    | 0%   |
|               | Clade B (29)  | 0%          | 24%  | 34%  | 69%  | 55% | 79%  | 97%     | 28%  |
|               | Clade BC (11) | 0%          | 0%   | 45%  | 36%  | 18% | 0%   | 100%    | 0%   |
|               | Clade C (26)  | 4%          | 23%  | 27%  | 54%  | 0%  | 8%   | 100%    | 4%   |
|               | Clade G (1)   | 0%          | 0%   | 0%   | 0%   | 0%  | 0%   | 100%    | 0%   |
|               | Tier-2        | Clade A (5) | 14%  | 20%  | 20%  | 0%  | 0%   | 100%    | 100% |
| Clade AD (1)  |               | 0%          | 0%   | 100% | 0%   | 0%  | 100% | 100%    | 0%   |
| Clade AG (16) |               | 0%          | 0%   | 50%  | 25%  | 38% | 25%  | 100%    | 0%   |
| Clade B (24)  |               | 0%          | 8%   | 42%  | 63%  | 50% | 75%  | 97%     | 13%  |
| Clade BC (11) |               | 0%          | 0%   | 45%  | 36%  | 18% | 0%   | 100%    | 0%   |
| Clade C (24)  |               | 0%          | 17%  | 29%  | 54%  | 0%  | 9%   | 100%    | 0%   |
| Clade G (1)   |               | 0%          | 0%   | 0%   | 0%   | 0%  | 0%   | 100%    | 0%   |

Shown is the percentage of HIV-1 isolates neutralized by each mAb as indicated in Figure 2. In parenthesis are shown the number of isolates in each analyzed group.
