# Supplementary material for: Analysis of Memory B Cell Responses and Isolation of Novel Monoclonal Antibodies with Neutralizing Breadth from HIV-1-Infected Individuals
Source: PubMed Central journal article supplement (PMC2808385; doi:10.1371/journal.pone.0008805), 2010-01-20
Supplement: pone.0008805.s005.pdf [file pone.0008805.s005.pdf]

**Table S4. HK20 Fab fragment shows increase in neutralization breadth and potency**

| HIV-1 isolate  | Clade | IC50 ( $\mu\text{g/ml}$ ) |      |
|----------------|-------|---------------------------|------|
|                |       | IgG                       | Fab  |
| Q461.e2        | A     | 7.34                      | 0.49 |
| Q769.d22       | A     | 9.22                      | 0.11 |
| Q168.a2        | AD    | 40.85                     | 0.12 |
| T257-31        | AG    | 35.04                     | 0.16 |
| 263-8          | AG    | 68.70                     | 1.19 |
| SF162          | B     | 9.64                      | 0.27 |
| SC42261.8      | B     | 10.03                     | 0.15 |
| CAAN5342.A2    | B     | 9.63                      | 0.09 |
| JRFL           | B     | >100                      | >10  |
| BaL            | B     | 84.77                     | 0.28 |
| THRO4153.67    | B     | >100                      | 0.48 |
| H022.7         | B     | >100                      | 5.70 |
| CH181.12       | BC    | 15.50                     | 0.43 |
| CH064.20       | BC    | 11.10                     | 0.06 |
| ZM214M.PL15    | C     | 5.84                      | 0.01 |
| ZM53M.PB12     | C     | 15.44                     | 0.60 |
| ZM109F.PB4     | C     | 14.14                     | 0.15 |
| CAP210.2.00.E8 | C     | 11.89                     | 0.16 |
| Du151..2       | C     | 16.62                     | 0.61 |
| ZM249.PL1      | C     | 6.68                      | 0.25 |
| 93MW965.26     | C     | 8.50                      | 0.08 |
| 96ZM651.2      | C     | 1.46                      | 0.04 |
| VSV-G          |       | >100                      | >10  |

HK20 IgG and Fab fragments were tested against a panel of 28 HIV-1 primary isolates in a HOS-based neutralization assay. Shown is the IC50 value in  $\mu\text{g/ml}$ .
