# Supplementary material for: Analysis of Memory B Cell Responses and Isolation of Novel Monoclonal Antibodies with Neutralizing Breadth from HIV-1-Infected Individuals
Source: PubMed Central journal article supplement (PMC2808385; doi:10.1371/journal.pone.0008805), 2010-01-20
Supplement: pone.0008805.s006.pdf [file pone.0008805.s006.pdf]

**Table S5. MAb IC50 titers against HIV-1 M7-Luc cells**

| mAb     | ID50 (mg/ml) in M7-Luc cells |                     |                    |                    |                    |
|---------|------------------------------|---------------------|--------------------|--------------------|--------------------|
|         | Bal.LucR.T2A.ecto            | SF162.LucR.T2A.ecto | CH40.LucR.T2A.ecto | CH58.LucR.T2A.ecto | WITO.LucR.T2A.ecto |
| HK20    | 22.7                         | 3.2                 | 3.9                | 24.3               | -*                 |
| HGN194  | 7.1                          | <0.05               | -                  | 2.1                | -*                 |
| HJ16    | -                            | -                   | -                  | -*                 | -*                 |
| Ctr mAb | -                            | -                   | -                  | nd                 | nd                 |

MAbs were purified and tested at different concentrations starting from 100 µg/ml for their capacity to neutralize 5 HIV-1 replication competent infectious viruses (clade B) carrying luciferase gene as reporter gene and using M7-Luc cells as target cells. Shown are IC50 values (µg/ml). Red cases, 0.01-1 µg/ml; orange, 1.1-10 µg/ml; yellow, 10.1-100 µg/ml; MAbs neutralizing <50% at 100 µg/ml were scored as negative (-). -\*, mAbs tested at 50 µg/ml.nd, not tested.
